# Supplementary material for: UM171 expands distinct types of myeloid and NK progenitors from human pluripotent stem cells
Source: PubMed Central journal article supplement (PMC6488662; doi:10.1038/s41598-019-43054-4), 2019-04-29
Supplement: 41598_2019_43054_MOESM1_ESM.pdf [file 41598_2019_43054_MOESM1_ESM.pdf]

## **Supplemental Materials for**

Walatta-Tseyon Mesquitta, Matthew Wandsnider, HyunJun Kang, James Thomson, Oleg Moskvin, Kran Suknuntha, and Igor I. Slukvin

UM171 expands distinct types of myeloid and NK progenitors from human pluripotent stem cells

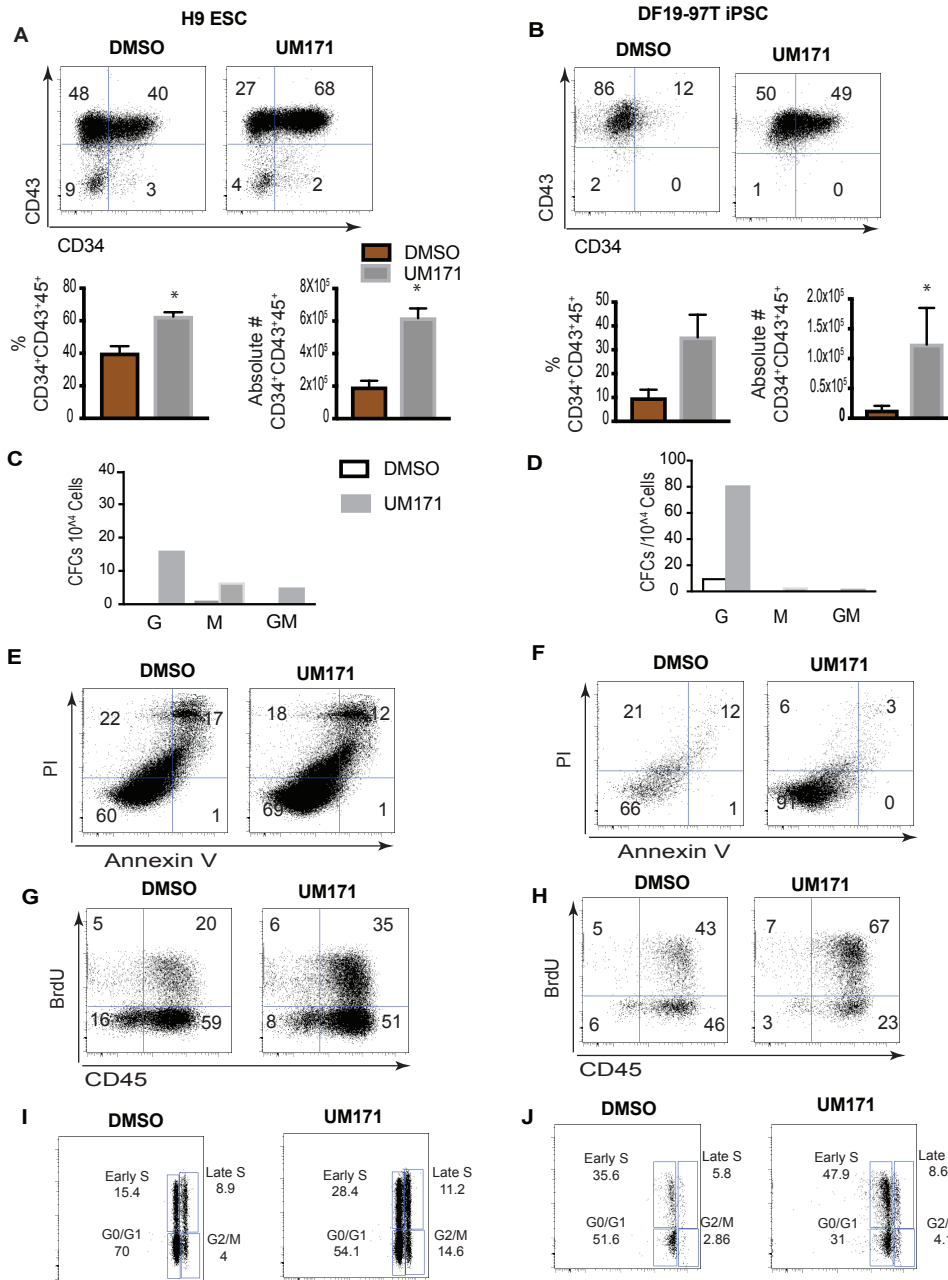

**Figure S1. UM171 effect on expansion of CD34<sup>+</sup>CD43<sup>+</sup> HPs derived from H9 hESCs and DF19-9-7T fibroblast-derived iPSCs.** (A)-(B) Representative dot plots showing CD34 and CD43 expression following 5 days of expansion hPSC-derived HPs with UM171 or DMSO (control). Bar graphs showing UM171 effect on % and absolute numbers of CD34<sup>+</sup>CD43<sup>+</sup>CD45<sup>+</sup> HPs. Results are mean±SEM for 3 independent experiments. \*p<0.05. (C)-(D) Graphs showing CFC potential of expanded cells. (E)-(F) Representative dot plots showing apoptosis evaluation using annexin V staining, in cultures of hPSC-derived HPs expanded for 5 days. Dot plots show CD34<sup>+</sup>CD43<sup>+</sup> gated cells. (G)-(H) Representative dot plots showing assessment of proliferative potential of CD34<sup>+</sup>CD45<sup>+</sup> HPs expanded for 5 days with UM171 or DMSO, using (G-H) BrdU assay and (I,J) cell cycle analysis. (A), (C), (E), (G), (I) showing H9 hESCs and (B), (D), (F), (H), (J) showing DF19-9-7T iPSCs.

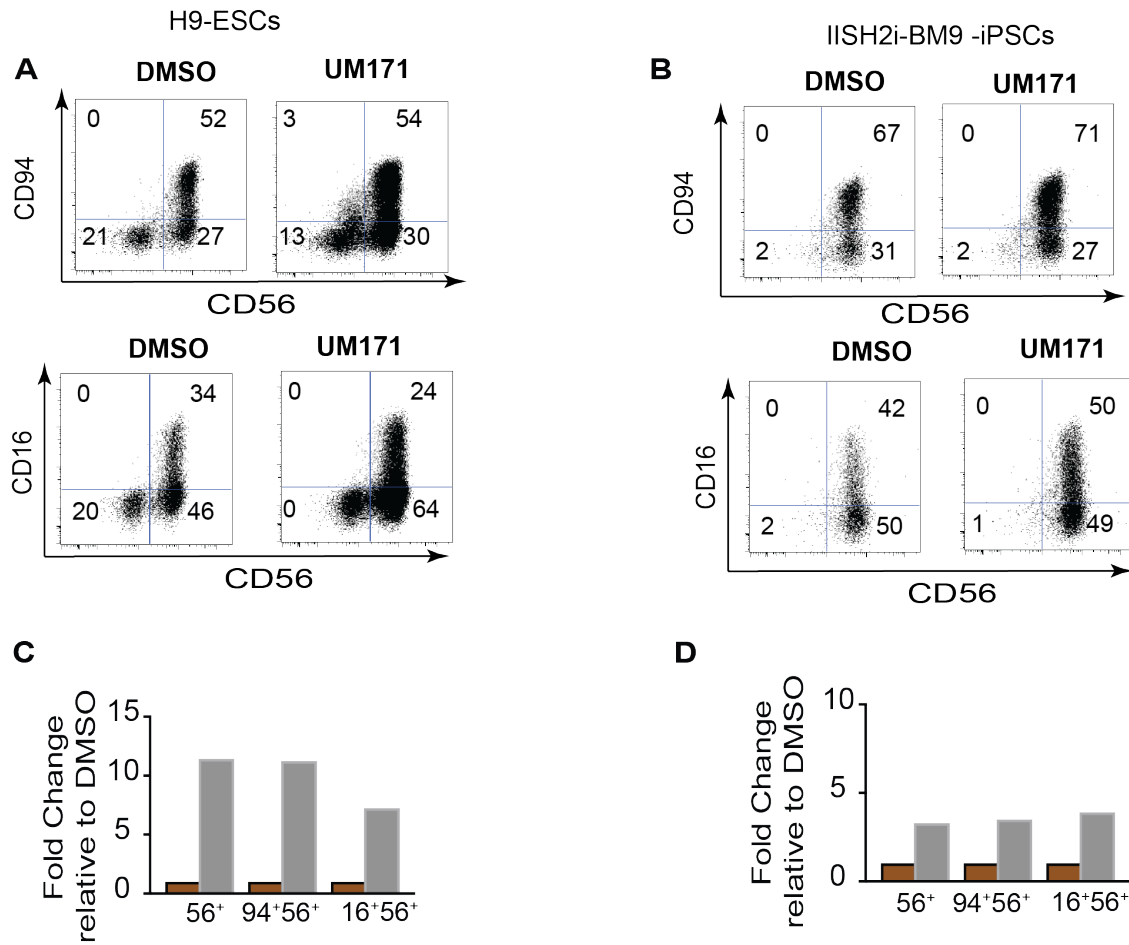

**Figure S2. Effect of UM171 on NK cell production from CD34<sup>+</sup>CD43<sup>+</sup> HPs derived from H9 hESC and IISH2i-BM9 derived from bone marrow iPSCs.** (A)-(B) Representative flow cytometry dot plots displaying NK cell differentiation. (C)-(D) Bar graphs showing fold changes in absolute numbers of NK cell subsets. Representative experiment is shown.
